# Supplementary material
Source: MDPI journal article supplement (https://www.mdpi.com/2075-163X/12/9/1137)
Supplement: s1 [file s1]

Supplement Table S1. Compositions of the different generations of arsenopyrite in Laozuoshan gold deposit (Data from EPMA, wt.%)

| Stage | No.      | Co   | Ag   | Fe    | S     | Zn   | Au   | Cu   | Ni   | As    | Total  | Fe*   | As*   | S*    | Data source          |
|-------|----------|------|------|-------|-------|------|------|------|------|-------|--------|-------|-------|-------|----------------------|
| Apy-1 | L-7D-2   | 2.08 | <mdl | 33.18 | 18.70 | <mdl | <mdl | <mdl | 0.04 | 47.70 | 101.69 | 0.328 | 0.351 | 0.321 | Meng et al.,<br>2020 |
|       | LDK-4-2  | 1.09 | <mdl | 33.98 | 18.84 | <mdl | 0.02 | <mdl | 0.26 | 47.99 | 102.18 | 0.331 | 0.349 | 0.320 |                      |
|       | L-7B-2   | 4.19 | <mdl | 30.09 | 18.48 | <mdl | 0.02 | <mdl | 0.75 | 47.75 | 101.29 | 0.307 | 0.364 | 0.329 |                      |
|       | L-7B-5   | 2.99 | <mdl | 31.97 | 18.97 | <mdl | 0.01 | <mdl | 0.21 | 46.67 | 100.83 | 0.320 | 0.349 | 0.331 |                      |
|       | L-7B-6   | 2.96 | <mdl | 32.07 | 18.53 | <mdl | 0.01 | <mdl | 0.09 | 47.58 | 101.24 | 0.321 | 0.355 | 0.323 |                      |
|       | L-7B-11  | 2.82 | <mdl | 32.17 | 18.06 | <mdl | <mdl | <mdl | 0.10 | 49.02 | 102.17 | 0.321 | 0.365 | 0.314 |                      |
|       | L-7D-14  | 2.92 | <mdl | 31.71 | 17.64 | <mdl | <mdl | <mdl | 0.37 | 49.41 | 102.05 | 0.319 | 0.371 | 0.310 | In this study        |
|       | LDK-1-3  | 0.08 | <mdl | 34.43 | 17.49 | <mdl | 0.03 | <mdl | 0.09 | 48.05 | 100.18 | 0.342 | 0.356 | 0.302 |                      |
|       | LDK-1-5  | 0.23 | <mdl | 34.08 | 16.93 | <mdl | 0.04 | <mdl | 0.06 | 49.21 | 100.55 | 0.340 | 0.366 | 0.294 |                      |
|       | LDK-1-6  | 0.21 | <mdl | 34.57 | 17.56 | <mdl | 0.02 | <mdl | 0.04 | 47.63 | 100.04 | 0.343 | 0.353 | 0.304 |                      |
|       | LDK-1-7  | 0.34 | <mdl | 33.81 | 16.57 | 0.01 | 0.02 | <mdl | 0.09 | 50.71 | 101.55 | 0.337 | 0.376 | 0.287 |                      |
|       | LDK-1-8  | 1.74 | 0.01 | 32.90 | 17.25 | 0.01 | <mdl | <mdl | 0.02 | 48.36 | 100.28 | 0.332 | 0.364 | 0.303 |                      |
|       | LDK-1-9  | 0.35 | <mdl | 34.28 | 17.64 | <mdl | 0.02 | <mdl | 0.09 | 49.24 | 101.62 | 0.337 | 0.361 | 0.302 |                      |
|       | Max.     | 4.19 | 0.01 | 34.57 | 18.97 | 0.01 | 0.04 | <mdl | 0.75 | 50.71 | 102.18 | 0.343 | 0.376 | 0.331 |                      |
|       | Min.     | 0.08 | <mdl | 30.09 | 16.57 | <mdl | <mdl | <mdl | 0.02 | 46.67 | 100.04 | 0.307 | 0.349 | 0.287 |                      |
|       | Average  | 1.69 | 0.00 | 33.02 | 17.90 | 0.00 | 0.02 | 0.00 | 0.17 | 48.41 | 101.21 | 0.329 | 0.360 | 0.311 |                      |
|       | S.D.     | 1.40 | 0.00 | 1.35  | 0.76  | 0.00 | 0.01 | 0.00 | 0.20 | 1.06  | 0.76   | 0.011 | 0.009 | 0.013 |                      |
| Apy-2 | LZS-3-1  | 0.29 | <mdl | 34.86 | 19.29 | <mdl | <mdl | <mdl | 0.01 | 46.03 | 100.47 | 0.339 | 0.334 | 0.327 | Meng et al.,<br>2020 |
|       | LZS-3-3  | 0.07 | <mdl | 35.10 | 19.21 | 0.02 | <mdl | <mdl | <mdl | 45.51 | 99.90  | 0.343 | 0.331 | 0.326 |                      |
|       | LZS-3-4  | 0.13 | <mdl | 35.46 | 19.52 | 0.01 | 0.01 | 0.01 | <mdl | 45.81 | 100.94 | 0.342 | 0.330 | 0.328 |                      |
|       | LZS-3-33 | 0.19 | <mdl | 35.09 | 19.63 | <mdl | 0.01 | <mdl | <mdl | 46.87 | 101.78 | 0.337 | 0.335 | 0.328 |                      |
|       | LZS-3-36 | 0.29 | <mdl | 34.75 | 19.34 | <mdl | <mdl | <mdl | <mdl | 45.95 | 100.32 | 0.338 | 0.334 | 0.328 |                      |

|       |           |      |      |       |       |      |      |      |      |       |        |       |       |       |               |
|-------|-----------|------|------|-------|-------|------|------|------|------|-------|--------|-------|-------|-------|---------------|
|       | LZS-3-38  | 0.04 | 0.03 | 35.53 | 19.40 | <mdl | <mdl | <mdl | <mdl | 46.14 | 101.13 | 0.343 | 0.332 | 0.326 |               |
|       | LZS-3-17  | 0.09 | <mdl | 34.79 | 18.80 | 0.01 | 0.17 | 0.01 | <mdl | 48.45 | 102.36 | 0.336 | 0.348 | 0.316 | In this study |
|       | Max       | 0.29 | 0.04 | 35.53 | 19.63 | 0.02 | 0.17 | 0.01 | 0.01 | 48.45 | 102.36 | 0.343 | 0.348 | 0.328 |               |
|       | Min       | 0.04 | <mdl | 34.75 | 18.80 | <mdl | <mdl | <mdl | <mdl | 45.51 | 99.90  | 0.336 | 0.330 | 0.316 |               |
|       | Average   | 0.16 | 0.01 | 35.08 | 19.31 | 0.00 | 0.03 | 0.00 | 0.00 | 46.39 | 100.99 | 0.340 | 0.335 | 0.326 |               |
|       | S.D.      | 0.10 | 0.02 | 0.31  | 0.27  | 0.01 | 0.06 | 0.01 | 0.00 | 1.00  | 0.86   | 0.003 | 0.006 | 0.004 |               |
| Apy-3 | LZS-9T-03 | 6.83 | <mdl | 26.51 | 17.92 | <mdl | <mdl | <mdl | 1.20 | 49.42 | 101.87 | 0.280 | 0.390 | 0.330 |               |
|       | LZS-9T-05 | 5.60 | 0.04 | 28.35 | 17.79 | 0.01 | 0.17 | <mdl | 0.51 | 50.15 | 102.63 | 0.293 | 0.386 | 0.320 |               |
|       | LZS-9T-11 | 6.92 | <mdl | 27.10 | 18.20 | <mdl | <mdl | <mdl | 0.58 | 49.17 | 101.96 | 0.284 | 0.384 | 0.332 |               |
|       | LZS-9T-17 | 2.91 | 0.02 | 31.16 | 18.51 | <mdl | 0.18 | <mdl | 0.33 | 48.67 | 101.77 | 0.313 | 0.364 | 0.323 |               |
|       | LZS-9T-20 | 0.60 | <mdl | 33.69 | 18.54 | <mdl | <mdl | <mdl | 0.01 | 48.72 | 101.55 | 0.329 | 0.355 | 0.316 | In this study |
|       | LZS-9T-25 | 5.02 | <mdl | 27.30 | 17.52 | <mdl | 0.02 | <mdl | 1.93 | 50.36 | 102.15 | 0.286 | 0.394 | 0.320 |               |
|       | LZS-9T-28 | 1.29 | <mdl | 29.20 | 17.24 | <mdl | 0.02 | <mdl | 2.11 | 50.62 | 100.47 | 0.301 | 0.389 | 0.310 |               |
|       | LZS-9T-35 | 4.14 | 0.05 | 29.34 | 18.16 | <mdl | 0.08 | <mdl | 0.97 | 50.07 | 102.79 | 0.299 | 0.380 | 0.322 |               |
|       | Max       | 6.92 | 0.05 | 33.69 | 18.54 | 0.01 | 0.18 | 0.00 | 2.11 | 50.62 | 102.79 | 0.329 | 0.394 | 0.332 |               |
|       | Min       | 0.60 | <mdl | 26.51 | 17.24 | <mdl | <mdl | <mdl | 0.01 | 48.67 | 100.47 | 0.280 | 0.355 | 0.310 |               |
|       | Average   | 4.16 | 0.01 | 29.08 | 17.98 | 0.00 | 0.06 | 0.00 | 0.95 | 49.65 | 101.90 | 0.298 | 0.380 | 0.322 |               |
|       | S.D.      | 2.39 | 0.02 | 2.39  | 0.46  | 0.00 | 0.08 | 0.00 | 0.75 | 0.75  | 0.72   | 0.016 | 0.014 | 0.007 |               |
| Apy-4 | L-8A1-3   | 0.18 | <mdl | 33.69 | 19.29 | <mdl | 0.02 | <mdl | 0.98 | 46.42 | 100.58 | 0.331 | 0.340 | 0.330 |               |
|       | L-8A1-9   | 0.31 | <mdl | 34.04 | 19.88 | <mdl | 0.05 | <mdl | 0.09 | 46.18 | 100.55 | 0.330 | 0.334 | 0.336 | Meng et al.,  |
|       | L-8B-5    | 0.08 | <mdl | 35.33 | 20.09 | <mdl | <mdl | <mdl | 0.18 | 46.68 | 102.36 | 0.336 | 0.331 | 0.333 | 2020          |
|       | L-8B-3    | 0.05 | <mdl | 34.93 | 19.59 | <mdl | <mdl | 0.01 | 0.56 | 46.62 | 101.75 | 0.336 | 0.335 | 0.329 |               |
|       | LZK-6-1-2 | 0.04 | 0.01 | 34.22 | 19.53 | <mdl | <mdl | <mdl | 0.29 | 45.79 | 99.88  | 0.334 | 0.333 | 0.332 | In this study |
|       | Max       | 0.31 | 0.01 | 35.33 | 20.09 | <mdl | 0.05 | 0.01 | 0.98 | 46.68 | 102.36 | 0.336 | 0.340 | 0.336 |               |

---

|      |      |      |       |       |      |      |      |      |       |        |       |       |       |
|------|------|------|-------|-------|------|------|------|------|-------|--------|-------|-------|-------|
| Min  | 0.04 | <mdl | 33.69 | 19.29 | <mdl | <mdl | <mdl | 0.09 | 45.79 | 99.88  | 0.330 | 0.331 | 0.329 |
| Ave. | 0.13 | 0.00 | 34.44 | 19.67 | 0.00 | 0.01 | 0.00 | 0.42 | 46.34 | 101.02 | 0.334 | 0.335 | 0.332 |
| S.D. | 0.11 | 0.00 | 0.67  | 0.31  | 0.00 | 0.02 | 0.00 | 0.36 | 0.36  | 1.00   | 0.003 | 0.003 | 0.003 |

---

**Notes:** <mdl – under minimum detection limit; S. D. – standard deviation; Fe\*-Fe (at.%) in arsenopyrite; As\*-As (at.%) in arsenopyrite; S\*-S (at.%) in arsenopyrite.

Supplement Table S2. Compositions of gold in Laozuoshan gold deposit (Data from EPMA, wt.%)

| Stage | Sample    | Co   | Ag    | Fe   | Bi   | S    | Au    | Zn   | Te   | Cu   | Sb   | Ni   | As   | Total  | Name        | Date Source       |
|-------|-----------|------|-------|------|------|------|-------|------|------|------|------|------|------|--------|-------------|-------------------|
| Au-1  | L-7B-4    | -    | 15.08 | 0.10 | -    | 0.16 | 82.49 | <mdl | -    | <mdl | -    | <mdl | 0.01 | 97.84  | Electrum    | Meng et al., 2020 |
|       | L-7B-13   | -    | 14.90 | 0.76 | -    | 0.23 | 81.53 | <mdl | -    | <mdl | -    | <mdl | <mdl | 97.42  | Electrum    |                   |
|       | L-7D-3    | -    | 14.54 | 0.34 | -    | 0.27 | 86.93 | <mdl | -    | 0.55 | -    | <mdl | <mdl | 102.63 | Electrum    |                   |
|       | L-7D-16   | -    | 17.45 | 0.25 | -    | 0.07 | 84.16 | 0.01 | -    | <mdl | -    | <mdl | 0.01 | 101.95 | Electrum    |                   |
|       | LZS-7T-07 | <mdl | 14.37 | 0.06 | 0.73 | <mdl | 84.93 | 0.02 | 0.06 | <mdl | <mdl | 0.03 | 0.04 | 100.25 | Electrum    | In this study     |
|       | LZS-7T-03 | <mdl | 13.91 | 0.11 | 0.71 | <mdl | 87.04 | 0.14 | 0.13 | <mdl | <mdl | <mdl | <mdl | 102.05 | Electrum    |                   |
|       | LZS-7T-11 | 0.04 | 15.11 | 0.04 | 0.57 | <mdl | 82.98 | 0.02 | 0.10 | <mdl | <mdl | <mdl | <mdl | 98.87  | Electrum    |                   |
|       | L-7B-3    | <mdl | 14.11 | 0.10 | 0.83 | <mdl | 87.27 | <mdl | 0.01 | <mdl | <mdl | <mdl | 0.03 | 102.35 | Electrum    |                   |
|       | L-7B-8    | <mdl | 14.02 | 0.12 | 0.80 | <mdl | 84.99 | 0.01 | 0.09 | <mdl | <mdl | 0.02 | 0.02 | 100.07 | Electrum    |                   |
|       | L-7B-9    | <mdl | 13.67 | 0.39 | 0.61 | <mdl | 83.90 | 0.01 | 0.16 | <mdl | <mdl | 0.01 | <mdl | 98.74  | Electrum    |                   |
|       | L-7B-10   | -    | 13.73 | 0.25 | -    | 0.04 | 83.89 | 0.01 | -    | <mdl | -    | 0.01 | <mdl | 97.93  | Electrum    |                   |
|       | L-7D-2    | <mdl | 14.00 | 0.36 | 0.65 | 0.01 | 85.35 | 0.01 | <mdl | <mdl | <mdl | <mdl | 0.03 | 100.42 | Electrum    |                   |
|       | L-7D-6    | <mdl | 15.71 | 0.21 | 0.83 | 0.01 | 84.38 | 0.03 | 0.04 | <mdl | <mdl | <mdl | <mdl | 101.21 | Electrum    |                   |
|       | L-7D-11   | 0.01 | 32.10 | 0.28 | 0.64 | 0.04 | 68.57 | 0.04 | 0.32 | 0.42 | <mdl | <mdl | <mdl | 102.43 | Electrum    |                   |
|       | Max       | 0.04 | 32.10 | 0.76 | 0.83 | 0.27 | 87.27 | 0.14 | 0.32 | 0.55 | <mdl | 0.03 | 0.04 | 102.63 |             |                   |
|       | Min       | <mdl | 13.67 | 0.04 | 0.57 | <mdl | 68.57 | <mdl | <mdl | <mdl | <mdl | <mdl | <mdl | 97.42  |             |                   |
|       | Everage   | 0.01 | 15.91 | 0.24 | 0.71 | 0.06 | 83.46 | 0.02 | 0.10 | 0.07 | 0.00 | 0.01 | 0.01 | 100.30 |             |                   |
|       | S.D.      | 0.01 | 4.77  | 0.19 | 0.10 | 0.09 | 4.60  | 0.04 | 0.10 | 0.18 | 0.00 | 0.01 | 0.01 | 1.87   |             |                   |
| Au-2  | LZS-3-6   | -    | 7.73  | 0.10 | -    | <mdl | 90.38 | <mdl | -    | <mdl | -    | <mdl | <mdl | 98.21  | Native gold | Meng et al., 2020 |
|       | LZS-3-21  | -    | 7.33  | 0.03 | -    | 0.34 | 89.87 | 0.01 | -    | <mdl | -    | <mdl | 0.10 | 97.68  | Electrum    |                   |
|       | LZS-3-22  | -    | 9.01  | 0.19 | -    | 0.09 | 90.45 | 0.01 | -    | <mdl | -    | <mdl | 0.05 | 99.80  | Native gold |                   |
|       | LZS-3-1-1 | <mdl | 8.12  | 0.06 | 0.72 | <mdl | 90.18 | <mdl | 0.05 | <mdl | 0.00 | 0.03 | 0.08 | 99.23  | Native gold | In this study     |
|       | LZS-3-2   | <mdl | 7.97  | 0.07 | 0.71 | 0.03 | 91.42 | <mdl | 0.02 | 0.02 | 0.00 | 0.01 | 0.04 | 100.29 | Native gold |                   |

|      |           |      |       |      |      |      |       |      |      |      |      |      |      |        |             |
|------|-----------|------|-------|------|------|------|-------|------|------|------|------|------|------|--------|-------------|
|      | Max       | <mdl | 9.01  | 0.19 | 0.72 | 0.34 | 91.42 | 0.01 | 0.05 | 0.02 | 0.00 | 0.03 | 0.10 | 100.29 |             |
|      | Min       | <mdl | 7.33  | 0.03 | 0.71 | <mdl | 89.87 | <mdl | 0.02 | <mdl | <mdl | <mdl | <mdl | 97.68  |             |
|      | Everage   | 0.00 | 8.03  | 0.09 | 0.71 | 0.09 | 90.46 | 0.00 | 0.04 | 0.00 | 0.00 | 0.01 | 0.05 | 99.04  |             |
|      | S.D.      | 0.00 | 0.62  | 0.06 | 0.01 | 0.14 | 0.58  | 0.01 | 0.02 | 0.01 | 0.00 | 0.01 | 0.04 | 1.09   |             |
| Au-3 | LZS-9T-07 | 0.22 | 0.61  | 1.67 | 0.71 | 0.01 | 98.43 | 0.01 | <mdl | <mdl | 0.01 | 0.07 | 0.05 | 101.79 | Native gold |
|      | LZS-9T-02 | 0.16 | 45.02 | 1.21 | 0.65 | 0.20 | 51.77 | 0.01 | 0.09 | <mdl | <mdl | 0.06 | 0.41 | 99.57  | Electrum    |
|      | LZS-9T-04 | 0.15 | 42.62 | 1.90 | 0.42 | 0.04 | 55.58 | <mdl | 0.43 | <mdl | <mdl | 0.06 | 0.05 | 101.24 | Electrum    |
|      | LZS-9T-10 | 0.15 | 19.14 | 0.99 | 0.49 | 0.06 | 78.69 | 0.03 | 0.19 | <mdl | <mdl | 0.02 | 0.02 | 99.79  | Electrum    |
|      | LZS-9T-14 | 0.07 | 46.55 | 0.91 | 0.47 | 0.05 | 52.71 | <mdl | 0.04 | <mdl | <mdl | 0.06 | 0.07 | 100.94 | Electrum    |
|      | LZS-9T-19 | <mdl | 38.72 | 0.09 | 0.48 | <mdl | 58.35 | <mdl | 0.42 | <mdl | <mdl | <mdl | 0.01 | 98.09  | Electrum    |
|      | LZS-9T-27 | 0.06 | 33.90 | 0.96 | 0.43 | 0.04 | 62.00 | 0.09 | 0.35 | <mdl | <mdl | 0.09 | 0.04 | 97.95  | Electrum    |
|      | LZS-9T-30 | 0.29 | 42.46 | 4.18 | 0.49 | 0.88 | 50.26 | <mdl | 0.37 | <mdl | <mdl | 0.14 | 1.88 | 100.92 | Electrum    |
|      | LZS-9T-31 | 0.13 | 35.66 | 1.03 | 0.48 | 0.01 | 62.99 | 0.05 | 0.42 | <mdl | <mdl | 0.05 | 0.04 | 100.85 | Electrum    |
|      | LZS-9T-33 | 0.09 | 46.12 | 0.69 | 0.33 | 0.05 | 50.23 | 0.01 | 0.45 | <mdl | <mdl | 0.01 | 0.10 | 98.07  | Electrum    |
|      | Max       | 0.29 | 46.55 | 4.18 | 0.71 | 0.88 | 98.43 | 0.09 | 0.45 | <mdl | 0.01 | 0.14 | 1.88 | 101.79 |             |
|      | Min       | <mdl | 0.61  | 0.09 | 0.33 | <mdl | 50.23 | <mdl | <mdl | <mdl | <mdl | <mdl | 0.01 | 97.95  |             |
|      | Everage   | 0.13 | 35.08 | 1.36 | 0.50 | 0.13 | 62.10 | 0.02 | 0.27 | 0.00 | 0.00 | 0.06 | 0.27 | 99.92  |             |
|      | S.D.      | 0.08 | 14.61 | 1.11 | 0.11 | 0.27 | 15.38 | 0.03 | 0.18 | 0.00 | 0.00 | 0.04 | 0.58 | 1.45   |             |

In this study

**Notes:** <mdl – under minimum detection limit; S. D. – standard deviation; “-” – untested

Supplement Table S3. Compositions of the Bi-minerals in Laozuoshan gold deposit (Data from EPMA, wt.%)

| Stage   | Sample     | Co   | Ag   | Fe   | Bi    | S    | Au    | Zn   | Te    | Sb   | Se   | Total  | Chemical Formula                        | Name           |
|---------|------------|------|------|------|-------|------|-------|------|-------|------|------|--------|-----------------------------------------|----------------|
| Bi-Te-1 | L-7D-4     | 0.11 | <mdl | 1.22 | 63.21 | 0.05 | <mdl  | <mdl | 36.63 | <mdl | 0.17 | 101.39 | Bi <sub>1.05</sub> Te                   | Tsumoite       |
|         | LZS-7T-06  | <mdl | 0.02 | 0.06 | 67.95 | <mdl | <mdl  | 0.03 | 30.13 | <mdl | 0.29 | 98.49  | Bi <sub>1.38</sub> Te                   | Pilsenite      |
|         | L-7B-11    | <mdl | <mdl | 0.23 | 67.69 | 0.03 | 0.05  | <mdl | 29.90 | <mdl | 0.03 | 97.92  | Bi <sub>1.38</sub> Te                   | Pilsenite      |
|         | LZS-7T-08  | <mdl | <mdl | 0.53 | 63.96 | 4.81 | 0.13  | 0.01 | 30.33 | <mdl | 0.23 | 100.00 | Bi <sub>2.04</sub> Te <sub>1.58</sub> S | Ingodite       |
|         | LZS-7T-02  | <mdl | <mdl | 0.10 | 65.09 | 5.04 | <mdl  | <mdl | 28.47 | <mdl | 0.49 | 99.20  | Bi <sub>1.98</sub> Te <sub>1.42</sub> S | Ingodite       |
|         | LZS-7T-05  | <mdl | <mdl | 1.11 | 68.60 | 5.29 | <mdl  | 0.56 | 25.37 | <mdl | 0.54 | 101.47 | Bi <sub>1.99</sub> Te <sub>1.20</sub> S | Ingodite       |
|         | L-7B-2     | <mdl | <mdl | 0.20 | 66.85 | 5.05 | 0.02  | 0.02 | 25.50 | <mdl | -    | 97.65  | Bi <sub>2.03</sub> Te <sub>1.27</sub> S | Ingodite       |
|         | L-7B-6     | <mdl | 0.03 | 0.23 | 67.68 | 5.11 | <mdl  | 0.03 | 24.99 | <mdl | -    | 98.07  | Bi <sub>2.03</sub> Te <sub>1.23</sub> S | Ingodite       |
|         | L-7B-10    | <mdl | <mdl | 0.60 | 69.96 | 4.05 | <mdl  | <mdl | 21.37 | <mdl | 1.20 | 97.18  | Bi <sub>2.65</sub> Te <sub>1.33</sub> S | Ingodite       |
|         | LZS-7T-12  | 0.01 | <mdl | 0.15 | 73.13 | 2.64 | 0.10  | 0.03 | 21.83 | <mdl | 0.40 | 98.27  | Bi <sub>4.25</sub> Te <sub>2.08</sub> S | Joséite-B      |
|         | LZS-7T-01  | <mdl | <mdl | 0.29 | 73.04 | 2.58 | <mdl  | 0.03 | 22.10 | <mdl | 0.56 | 98.60  | Bi <sub>4.35</sub> Te <sub>2.15</sub> S | Joséite-B      |
|         | LZS-7T-04  | <mdl | <mdl | 0.62 | 75.25 | 2.70 | <mdl  | 1.20 | 21.78 | <mdl | 0.56 | 102.10 | Bi <sub>4.28</sub> Te <sub>2.03</sub> S | Joséite-B      |
|         | L-7B-5     | 0.01 | <mdl | 0.14 | 73.84 | 2.33 | <mdl  | 0.03 | 21.05 | <mdl | 1.26 | 98.66  | Bi <sub>4.86</sub> Te <sub>2.27</sub> S | Joséite-B      |
|         | L-7B-12    | <mdl | 0.03 | 0.11 | 74.98 | 2.46 | 0.14  | <mdl | 20.87 | <mdl | 1.10 | 99.69  | Bi <sub>4.67</sub> Te <sub>2.13</sub> S | Joséite-B      |
|         | L-7B-14    | <mdl | 0.02 | 0.10 | 74.52 | 2.65 | 0.04  | <mdl | 21.91 | <mdl | 0.28 | 99.52  | Bi <sub>4.32</sub> Te <sub>2.08</sub> S | Joséite-B      |
|         | L-7B-15    | <mdl | <mdl | 0.19 | 74.04 | 2.66 | <mdl  | <mdl | 21.50 | <mdl | 0.45 | 98.84  | Bi <sub>4.26</sub> Te <sub>2.03</sub> S | Joséite-B      |
|         | L-7D-3     | <mdl | <mdl | 0.13 | 74.51 | 2.63 | 0.10  | <mdl | 21.21 | <mdl | 0.50 | 99.08  | Bi <sub>4.34</sub> Te <sub>2.03</sub> S | Joséite-B      |
|         | L-7D-1     | <mdl | 0.03 | 0.12 | 75.09 | 2.64 | 0.03  | <mdl | 21.77 | <mdl | -    | 99.67  | Bi <sub>4.36</sub> Te <sub>2.07</sub> S | Joséite-B      |
|         | L-7D-7     | 0.03 | 0.06 | 0.14 | 75.02 | 2.63 | <mdl  | <mdl | 21.27 | <mdl | 0.76 | 99.90  | Bi <sub>4.37</sub> Te <sub>2.03</sub> S | Joséite-B      |
|         | L-7D-8     | 0.02 | 0.01 | 0.21 | 75.48 | 2.76 | 0.07  | 0.03 | 21.59 | <mdl | 0.23 | 100.39 | Bi <sub>4.20</sub> Te <sub>1.97</sub> S | Joséite-B      |
|         | L-7D-12    | <mdl | <mdl | 0.17 | 75.68 | 2.70 | 0.13  | 0.07 | 20.94 | <mdl | 0.66 | 100.35 | Bi <sub>4.30</sub> Te <sub>1.95</sub> S | Joséite-B      |
|         | L-7D-10    | <mdl | <mdl | 0.49 | 99.96 | 0.04 | <mdl  | 0.01 | <mdl  | 0.01 | 0.00 | 100.52 | Bi                                      | Native Bismuth |
| Bi-Te-2 | LZS-3-9    | <mdl | 0.01 | 0.08 | 33.32 | <mdl | 64.26 | <mdl | <mdl  | <mdl | <mdl | 97.67  | Au <sub>2.05</sub> Bi                   | Maldonite      |
|         | LZS-3-1-14 | 0.01 | <mdl | 0.02 | 33.06 | 0.01 | 65.01 | 0.02 | <mdl  | 0.02 | -    | 98.14  | Au <sub>2.09</sub> Bi                   | Maldonite      |

|         |            |      |      |      |        |      |       |      |       |      |      |        |                                         |                |
|---------|------------|------|------|------|--------|------|-------|------|-------|------|------|--------|-----------------------------------------|----------------|
|         | LZS-3-1-16 | 0.01 | <mdl | 0.68 | 77.35  | 0.03 | 0.02  | <mdl | 19.97 | <mdl | -    | 98.05  | Bi <sub>2.37</sub> Te                   | Hedleyite      |
|         | LZS-3-4    | <mdl | 0.01 | 0.19 | 80.07  | <mdl | <mdl  | <mdl | 18.58 | <mdl | 0.10 | 98.96  | Bi <sub>2.63</sub> Te                   | Hedleyite      |
|         | LZS-3-1    | 0.04 | <mdl | 0.17 | 96.78  | <mdl | <mdl  | <mdl | <mdl  | 0.98 | <mdl | 97.97  | Bi                                      | Native Bismuth |
|         | LZS-3-12   | <mdl | <mdl | 0.11 | 97.84  | <mdl | 0.04  | 0.01 | <mdl  | 1.13 | <mdl | 99.12  | Bi                                      | Native Bismuth |
|         | LZS-3-7    | <mdl | 0.03 | 0.07 | 98.14  | <mdl | <mdl  | <mdl | <mdl  | 0.31 | 0.02 | 98.58  | Bi                                      | Native Bismuth |
|         | LZS-3-1-13 | <mdl | 0.03 | 0.04 | 97.55  | <mdl | 0.09  | 0.02 | <mdl  | 0.41 | -    | 98.14  | Bi                                      | Native Bismuth |
|         | LZS-3-1-4  | 0.04 | <mdl | 0.54 | 99.47  | <mdl | 0.01  | <mdl | <mdl  | 0.94 | -    | 100.98 | Bi                                      | Native Bismuth |
| Bi-Te-3 | LZS-9T-12  | 0.30 | 0.28 | 2.16 | 34.32  | 0.04 | 65.17 | 0.04 | <mdl  | <mdl | 0.13 | 102.44 | Au <sub>2.01</sub> Bi                   | Maldonite      |
|         | LZS-9T-34  | 0.10 | 0.18 | 1.47 | 65.57  | 0.01 | 0.06  | 0.03 | 32.48 | <mdl | 0.14 | 100.05 | Bi <sub>1.23</sub> Te                   | Pilsenite      |
|         | LZS-9T-23  | 0.18 | <mdl | 0.85 | 75.34  | 2.50 | <mdl  | <mdl | 19.41 | <mdl | 1.58 | 99.86  | Bi <sub>4.62</sub> Te <sub>1.95</sub> S | Joséite-B      |
|         | LZS-9T-24  | 0.11 | 0.06 | 0.70 | 75.38  | 2.52 | 0.08  | <mdl | 19.15 | <mdl | 1.37 | 99.38  | Bi <sub>4.60</sub> Te <sub>1.91</sub> S | Joséite-B      |
|         | LZS-9T-01  | 0.16 | 0.01 | 0.85 | 75.90  | 2.28 | 0.07  | 0.01 | 17.91 | <mdl | 2.82 | 99.99  | Bi <sub>5.12</sub> Te <sub>1.98</sub> S | Joséite-B      |
|         | LZS-9T-15  | 0.02 | <mdl | 0.58 | 80.52  | 5.70 | 0.06  | 0.02 | 11.39 | <mdl | 0.73 | 99.01  | Bi <sub>4.31</sub> TeS <sub>1.99</sub>  | Joséite-A      |
|         | LZS-9T-13  | 0.11 | 0.09 | 0.60 | 97.01  | <mdl | 0.05  | 0.07 | <mdl  | 0.02 | <mdl | 97.95  | Bi                                      | Native Bismuth |
|         | LZS-9T-18  | <mdl | 0.07 | 0.34 | 99.84  | <mdl | 0.04  | 0.03 | <mdl  | 0.09 | 0.02 | 100.43 | Bi                                      | Native Bismuth |
|         | LZS-9T-29  | 0.19 | 0.01 | 2.22 | 99.86  | 0.02 | <mdl  | <mdl | <mdl  | <mdl | <mdl | 102.30 | Bi                                      | Native Bismuth |
|         | LZS-9T-16  | 0.10 | 0.02 | 0.89 | 100.27 | <mdl | <mdl  | <mdl | <mdl  | 0.04 | <mdl | 101.33 | Bi                                      | Native Bismuth |

Notes: <mdl – under minimum detection limit; “-” – untested
